# Supplementary material
Source: PubMed Central journal article supplement (PMC5679829)
Supplement: supp_the2017-0088_onco12226-sup-0001-suppinfo01.pdf [file supp_the2017-0088_onco12226-sup-0001-suppinfo01.pdf]

Supplemental Table for:  
Disparities of Trastuzumab Use in Resource-Limited or Resource-Abundant Regions and Its Survival Benefit on HER2-Positive Breast Cancer: A Real-World Study from China  
Jianbin Li et al.

**Table S1.** Courses of trastuzumab use in EBC and MBC

| Status of drug use          | Reasons             | EBC (n, %) |            | MBC (n, %) |            |
|-----------------------------|---------------------|------------|------------|------------|------------|
|                             |                     | ≤6m        | >6m        | ≤6m        | >6m        |
| End in use                  | Disease progression | 20 (10.3)  | 28 (12.9)  | 28 (13.0)  | 70 (22.7)  |
|                             | Financial problem   | 11 (5.6)   | 1 (0.5)    | 16 (7.4)   | 71 (23.0)  |
|                             | Drug tolerance      | 2 (1.0)    | 2 (0.9)    | 11 (5.1)   | 12 (3.9)   |
|                             | Course completion   | 0 (0)      | 139 (64.1) | 9 (4.2)    | 0 (0)      |
|                             | Others              | 7 (3.6)    | 16 (7.4)   | 6 (2.8)    | 3 (0.9)    |
| Median time of drug use (m) |                     | 12m        |            | 10m        |            |
| Still in use                |                     | 155 (79.5) | 31 (14.3)  | 146 (67.4) | 153 (49.5) |
| Overall                     |                     | 195        | 217        | 216        | 309        |

Others: clinical trials, loss of follow-up ect.
